# Supplementary material for: Informal Urban Green-Space: Comparison of Quantity and Characteristics in Brisbane, Australia and Sapporo, Japan
Source: PLoS One. 2014 Jun 18;9(6):e99784. doi: 10.1371/journal.pone.0099784 (PMC4062477; doi:10.1371/journal.pone.0099784)
Supplement: Table S2 — Non-IGS land use in Sapporo and Brisbane. (XLSX) [file pone.0099784.s002.xlsx]

## Sheet: Non-IGS land use
	Sapporo		Brisbane
Land use code	Area (m2)	Area (%)	Area (m2)	Area (%)
AGRDF	5405	0.0178678	0	0
AGRLS	0	0	3152	0.0104198
COMHD	1536	0.00507769	3758	0.0124231
COMLD	2712	0.00896529	1949	0.00644298
COMMD	366	0.00120992	1649	0.00545124
COMOH	1483	0.00490248	189	0.000624793
COMOL	35	0.000115702	0	0
COMOM	0	0	590	0.00195041
COMOT	0	0	855	0.00282645
FGSCN	32208	0.106473	7641	0.0252595
FGSPK	9493	0.0313818	16146	0.0533752
FGSPV	441	0.00145785	1085	0.00358678
FGSSR	4423	0.0146215	10164	0.0336
INDHD	265	0.000876033	0	0
INDLD	2494	0.00824463	3152	0.0104198
INDMD	16	5.28926e-05	2500	0.00826446
INFBP	205	0.000677686	321	0.00106116
INFCP	30670	0.101388	1433	0.00473719
INFMS	12318	0.0407207	6029	0.0199306
INFPZ	314	0.00103802	1537	0.00508099
INFRT	1464	0.00483967	3790	0.0125289
INFSS	40082	0.132502	41126	0.135954
INFSW	19221	0.0635405	6596	0.021805
INFUR	1017	0.00336198	88	0.000290909
OTHBG	2149	0.00710413	159	0.00052562
OTHCF	14276	0.0471934	10128	0.033481
OTHCS	69	0.000228099	1628	0.00538182
OTHOT	380	0.0012562	9967	0.0329488
OTHWR	319	0.00105455	16269	0.0537818
PGSCL	13210	0.0436694	11592	0.0383207
PGSCM	559	0.00184793	317	0.00104793
PGSGD	26193	0.0865884	62599	0.206939
PGSIN	217	0.000717355	70	0.000231405
PGSSG	5052	0.0167008	8434	0.027881
RESHD	4669	0.0154347	85	0.000280992
RESHT	428	0.00141488	160	0.000528926
RESLD	29236	0.0966479	37599	0.124294
RESMD	14791	0.0488959	10716	0.0354248
xCOMHDINFCP	224	0.000740496	0	0
xCOMHDRESMD	484	0.0016	0	0
xCOMLDINDLD	923	0.00305124	0	0
xCOMLDRESHD	244	0.000806612	0	0
xCOMLDRESLD	1451	0.00479669	0	0
xCOMLDRESMD	219	0.000723967	0	0
xCOMMDRESHD	260	0.000859504	0	0
xCOMMDRESLD	354	0.00117025	0	0
xCOMMDRESMD	890	0.00294215	0	0
xCOMOLRESLD	168	0.000555372	0	0
xCOMOLRESMD	197	0.00065124	0	0
xCOMOMRESMD	50	0.000165289	0	0
xINDLDRESLD	185	0.00061157	0	0
xINFBPINFMS	8	2.64463e-05	0	0
xINFBPINFSW	25	8.26446e-05	0	0
xINFCPCOMHD	1563	0.00516694	0	0
xINFCPOTHCF	214	0.000707438	0	0
xINFMSINFLS	207	0.000684298	0	0
xINFMSINFSW	54	0.000178512	0	0
xINFTSINFSW	189	0.000624793	0	0
xOTHCFCOMLDRESLD	74	0.000244628	0	0
xOTHCFRESMD	197	0.00065124	0	0
xOTHCSINFMS	1157	0.00382479	0	0
xOTHCSINFSW	397	0.0013124	0	0
xOTHOTINFMS	326	0.00107769	0	0
xOTHOTOTHCF	5	1.65289e-05	0	0
xRESLDCOMOL	160	0.000528926	0	0
